# Supplementary material for: Prolonged decay of molecular rate estimates for metazoan mitochondrial DNA
Source: PeerJ. 2015 Mar 5;3:e821. doi: 10.7717/peerj.821 (PMC4358697; doi:10.7717/peerj.821)
Supplement: Table S1 — Published and novel rate estimates used in the study. [file peerj-03-821-s003.xlsx]

## Sheet: data points all
DATA POINTS USED IN META-ANALYSIS:															DATA POINTS averaged FOR META-ANALYSIS:
organism	reference	calibration reference (if different)	calibration time (oldest; used in analysis)	evolutionary rate (mean; used in analysis)	calibration type	marker	marker type	animal group		log-transformed calibration time	log-transformed evolutionary rate	calibration time category (rounded down so that 0-104 will comprise x=0,1,2,3)	used in human intraspecific analysis (ISA)		organism	reference	calibration time (oldest)	evolutionary rate (mean)	calibration type	marker	marker type	animal group		logtime	lograte
4 insect orders + Decapoda	Brower 1994		3250000	1.15e-08	metaanalysis	COI, rDNA, restriction sites	coding	insect		6.51188	-7.9393	6
Banza (Orthoptera: Tettigoniidae)	Shapiro et al 2006		7200000	1.75e-08	Hawaiian islands ages	COI, cyt b	coding	insect		6.85733	-7.75696	6
Carabus (Coleoptera: Carabidae)	Pruser & Mossakowski 1998		5300000	3.4e-09	end of Messinian salinity crisis	ND1	coding	insect		6.72428	-8.46852	6
Coleoptera	Pons et al. 2010		250000000	1.342e-08	fossil	mitochondrial protein coding genes	coding	insect		8.39794	-7.87225	8
Darkling beetles (Coleoptera: Tenebrionidae)	Papadopoulou et al. 2010		10500000	1.84e-08	biogeography	COI	coding	insect		7.02119	-7.73518	7
Davidius (Odonata: Gomphidae)	Kiyoshi & Sota 2006		3500000	1.35e-08	opening of Tsushima Strait	COI	coding	insect		6.54407	-7.86967	6
Dolichopoda cave crickets	Allegrucci et al. 2011		5300000	1.12e-08	biogeography	COI, 12S, 16S	coding	insect		6.72428	-7.95078	6
															Dolichopoda cave crickets	Allegrucci et al. 2011	5300000	1.6e-08	biogeography	COI	coding	insect		6.72428	-7.79588
															Dolichopoda cave crickets	Allegrucci et al. 2011	5300000	1.1e-08	biogeography	12S	coding	insect		6.72428	-7.95861
															Dolichopoda cave crickets	Allegrucci et al. 2011	5300000	6.6e-09	biogeography	16S	coding	insect		6.72428	-8.18046
Drosophila (Diptera: Drosophilidae)	DeSalle et al 1987		2000000	1e-08	metaanalysis	ND1	coding	insect		6.30103	-8	6
Halobates (Hemiptera: Gerridae)	Andersen et al 2000		3000000	5.5e-09	Isthmus of Panama	COI	coding	insect		6.47712	-8.25964	6
Hemiptera: Cicadidae	Arensburger et al 2004		9300000	2e-08	geological calibration	COII	coding	insect		6.96848	-7.69897	6
Hemiptera: Psyllidae	Percy et al 2004		2000000	2.75e-08	island age (La Palma)	COI and COII	coding	insect		6.30103	-7.56067	6
Hemiptera: Psyllidae	Percy et al 2004		2000000	1.425e-08	island age (La Palma)	12S	coding	insect		6.30103	-7.84619	6
Hymenoptera: Agaonidae	Machado et al 2001		28000000	1.9e-08	fossils	COI	coding	insect		7.44716	-7.72125	7
Laupala (Orthoptera: Gryllidae)	Fleischer et al 1998		430000	5.1e-08	Hawaiian islands ages	12S, 16S, tRNAval	coding	insect		5.63347	-7.29243	5
Laupala (Orthoptera: Gryllidae)	Fleischer et al 1998		1600000	1.2e-08	Hawaiian islands ages	12S, 16S, tRNAval	coding	insect		6.20412	-7.92082	6
Leptodirini (Coleoptera: Leiodidae)	Caccone & Sbordoni 2001		29000000	1.25e-08	separation of Sardinia-Corsica	COI	coding	insect		7.4624	-7.90309	7
Nebria gregaria (Coleoptera: Carabidae)	Clarke et al 2001		150000	2.85e-08	Pleistocene glaciations	COI, COII, ND1, cyt b	coding	insect		5.17609	-7.54516	5
Nymphalinae (Lepidoptera: Nymphalidae)	Wahlberg 2006		34000000	1.14e-08	fossil	COI	coding	insect		7.53148	-7.9431	7
Papilio (Lepidoptera: Papilionidae)	Zakharov et al 2004		89100000	1.66e-09	fossil and biogeography	COI and COII	coding	insect		7.94988	-8.77989	7
Papuadytes (Coleoptera: Dytiscidae)	Balke et al 2007		10280000	1.14e-08	palaeoclimatic	COI, rrnL, cob	coding	insect		7.01199	-7.9431	7
Parnassius (Lepidoptera: Papilionidae)	Gratton et al 2008		15000	9.6e-08	geological, palaeoecological	COI	coding	insect		4.17609	-7.01773	4
Phlebotominae (Diptera: Psychodidae)	Esseghir et al 1997		10000000	5.25e-09	geological and palaeoclimatic	cyt b, ND1, tRNAser	coding	insect		7	-8.27984	7
Phlebotomus (Diptera: Psychodidae)	Esseghir et al 2000		10000000	7.85e-09	geological and palaeoclimatic	cyt b	coding	insect		7	-8.10513	7
Pimelia (Coleoptera: Tenebrionidae)	Juan et al 1995		2000000	1e-08	Canary island ages	COI	coding	insect		6.30103	-8	6
Plateumaris (Coleoptera: Chrysomelidae)	Sota & Hayashi 2007		6000000	8e-09	fossil calibration - multidivtime	COI	coding	insect		6.77815	-8.09691	6
Rivacindela (Coleoptera: Cicindelidae)	Pons & Vogler 2005		4000000	1.52e-08	biogeographic	rrnL+cox1+cob	coding	insect		6.60206	-7.81816	6
Sphodrini (Coleoptera: Carabidae)	Ruiz et al 2009		100000000	4.6e-09	fossils, island ages	COI, COII, tRNAleu	coding	insect		8	-8.33724	8
Stick insects (Bacillus)	Plazzi et al. 2011		408000000	3.1967e-09	fossil	almost entire mtgenome	coding	insect		8.61066	-8.4953	8
Tegeticula (Lepidoptera: Prodoxidae)	Smith et al 2008		29910000	2.75e-08	unpublished data	COI, nd5	coding	insect		7.47582	-7.56067	7
															Tegeticula (Lepidoptera: Prodoxidae)	Smith et al 2008	29910000	9e-09	unpublished data	COI	coding	insect		7.47582	-8.04576
															Tegeticula (Lepidoptera: Prodoxidae)	Smith et al 2008	29910000	4.6e-08	unpublished data	nd5	coding	insect		7.47582	-7.33724
Tetraopes (Coleoptera: Cerambycidae)	Farrell 2001		20000000	7.5e-09	habitat age	COI	coding	insect		7.30103	-8.12494	7
Timarcha (Coleoptera: Chrysomelidae)	Gomez-Zurita et al 2000		5300000	6.05e-09	end of Messinian salinity crisis	COII, 16S	coding	insect		6.72428	-8.21824	6
															Timarcha (Coleoptera: Chrysomelidae)	Gomez-Zurita et al 2000	5300000	7.6e-09	biogeography	COII	coding	insect		6.72428	-8.11919
															Timarcha (Coleoptera: Chrysomelidae)	Gomez-Zurita et al 2000	5300000	4.5e-09	biogeography	16S	coding	insect		6.72428	-8.34679
Triatoma (Hemiptera: Reduviidae)	Pfeiler et al 2006		8000000	5.625e-09	Gulf of California	cyt b, COI	coding	insect		6.90309	-8.24988	6
															Triatoma (Hemiptera: Reduviidae)	Pfeiler et al 2006	8000000	7.25e-09	biogeography	cyt b	coding	insect		6.90309	-8.13966
															Triatoma (Hemiptera: Reduviidae)	Pfeiler et al 2006	8000000	4e-09	biogeography	COI	coding	insect		6.90309	-8.39794
Zerynthia (Lepidoptera: Papilionidae)	Nazari & Sperling 2007		16500000	1.35e-08	geological	COI	coding	insect		7.21748	-7.86967	7
Bunchgrass lizards (Scleroporus Scalaris)	Bryson Jr. et al. 2012		30000000	1.2e-08	fossil	ND4, ATPase	coding	reptile		7.47712	-7.92082	7
Bushmaster viper (Lachesis muta)	Zamudio and Greene 1997		70000000	8.95e-09	secondary calibrations from a few studies based on fossil calibrations of species of similar weigh	cyt b, ND4	coding	reptile		7.8451	-8.04818	7
Chalcides and Sphenops skinks	Carranza et al. 2008		1000000	1.35e-08	biogeographic	cyt b, 12S	coding	reptile		6	-7.86967	6
Chalcides ocellatus skink	Kornilios et al. 2010		4600000	1.41e-08	secondary from Carranza et al. 2008	cyt b, 12S and ND1	coding	reptile		6.66276	-7.85078	6
Coleodactylus amazonicus gekko	Geurgas & Rodrigues 2009		28400000	8.7e-09	secondary calibration based on other secondary calibration (Geurgas et al. 2008) based on fossil and biogeographical calibrations (Gamble et al. 2008)	cyt b	coding	reptile		7.45332	-8.06048	7
Eremias argus lizard	Zhao et al. 2011		548000	2.091e-08	fossil	cyt b	coding	reptile		5.73878	-7.67965	5
Eremias brenchleyi lizard	Zhao et al. 2011		548000	2.162e-08	fossil	cyt b	coding	reptile		5.73878	-7.66514	5
Gallotia lizards	Cox et al. 2010		14670000	1.0874e-08	biogeography (island ages)	cyt b, COI, 12S, 16S	coding	reptile		7.16643	-7.96361	7
															Gallotia lizards	Cox et al. 2010	14670000	3.99e-09	biogeography	1st codon position, cyt b, COI	coding	reptile		7.16643	-8.39903
															Gallotia lizards	Cox et al. 2010	14670000	7.3e-10	biogeography	2nd codon position, cyt b, COI	coding	reptile		7.16643	-9.13668
															Gallotia lizards	Cox et al. 2010	14670000	4.02e-08	biogeography	3rd codon position, cyt b, COI	coding	reptile		7.16643	-7.39577
															Gallotia lizards	Cox et al. 2010	14670000	2.86e-09	biogeography	rRNA stems 12S, 16S	coding	reptile		7.16643	-8.54363
															Gallotia lizards	Cox et al. 2010	14670000	6.59e-09	biogeography	rRNA loops 12S, 16S	coding	reptile		7.16643	-8.18111
Hemidactylus geckos	Arnold et al. 2008		1000000	1.5e-08	biogeographic	cyt b, 12S	coding	reptile		6	-7.82391	6
Lacertine lizards	Carranza et al. 2004		1000000	1.4e-08	biogeographic	cyt b, 12S	coding	reptile		6	-7.85387	6
															Lacertine lizards	Carranza et al. 2004	1000000	5e-09	biogeography	12S	coding	reptile		6	-8.30103
															Lacertine lizards	Carranza et al. 2004	1000000	2.3e-08	biogeography	cyt b	coding	reptile		6	-7.63827
Leptodeira colubrid snake	Daza et al. 2009		72800000	1.34e-08	fossil	cyt b, ND4	coding	reptile		7.86213	-7.8729	7
Lophognathus and Amphibolurus lizards	Melville et al. 2011		180000000	6.2e-09	fossil, biogegraphy	ND2, some tRNA	coding	reptile		8.25527	-8.20761	8
Phrynocephalus erythrurus - Agama lizard	Jin & Liu 2009		10000000	7.62e-09	biogeographic - mountain range uplifts	ND2, tRNA	coding	reptile		7	-8.11805	7
Podarcis lizard	Pinho et al. 2007		16000000	1.13e-08	fossil?	ND4, tRNA	coding	reptile		7.20412	-7.94692	7
Racerunner lizards (Lacertidae: Eremias)	Guo et al. 2011		16000000	1.9e-09	fossil	16S	coding	reptile		7.20412	-8.72125	7
South American lizard genus Liolaemus (subgenus Eulaemus)	Fontanella et al. 2012		23470000	1.403e-08	fossil	cyt b, 12S	coding	reptile		7.37051	-7.85294	7
															South American lizard genus Liolaemus (subgenus Eulaemus)	Fontanella et al. 2012	23470000	2.23e-08	fossil	cyt b	coding	reptile		7.37051	-7.6517
															South American lizard genus Liolaemus (subgenus Eulaemus)	Fontanella et al. 2012	23470000	5.76e-09	fossil	12S	coding	reptile		7.37051	-8.23958
South American pitviper (Pothidium)	Wüster et al. 2002		3500000	7e-09	biogeography	cyt b, ND4	coding	reptile		6.54407	-8.1549	6
Tuatara	Molak et al. 2013	Hay et al 2008	8478	1.4432e-06	aDNA	d-loop	non-coding	reptile		3.92829	-5.84067	3
Turtles	Duchene et al. 2012		150000000	3.24e-09	fossil	d-loop, stem loop	non-coding	reptile		8.17609	-8.48945	8
Turtles	Duchene et al. 2012		150000000	8.8e-10	biogeography	12S, 16S	coding	reptile		8.17609	-9.05552	8
Accipitridae (New World Aquilinae (Oroaetus and Spizaetus), Old World Aquilinae (Old Word Spizaetus, Hieraaetus, Aquila and others))	Lerner & Mindell 2005; following Weir & Schulter 2008	Becker 1987	8000000	9.05025e-09	Fossil	cyt b	coding	bird		6.90309	-8.04334	6
Adelie penguin	Millar et al. 2008		6.46	5.5e-07	pedigree	HVRI	non-coding	bird		0.810233	-6.25964	0
Adelie penguin	Millar et al. 2008		37570	8.6e-07	aDNA	HVRI	non-coding	bird		4.57484	-6.0655	4
Adelie penguin	Subramanian et al. 2009		44000	2.1e-08	aDNA	mitogenome (only coding)	coding	bird		4.64345	-7.67778	4
Adelie penguin	this study	Lambert et al. 2002	6424	2.3054e-06	aDNA	d-loop	non-coding	bird		3.80781	-5.63725	3
Albatrosses (Poebastria and Diomedea)	Nunn et al. 1996		15000000	1.58e-08	fossil	cyt b	coding	bird		7.17609	-7.80134	7
Albatrosses (Thalassarche and Phoebetria)	Nunn et al. 1996		10000000	2.86e-08	fossil	cyt b	coding	bird		7	-7.54363	7
Alcidae (Cepphus, Fratercula, Cerorhinca, Ptychoramphus, Aethia)	Friesen et al 1996; following Weir & Schulter 2008	Becker 1987	10250000	9.02439e-09	Fossil	cyt b	coding	bird		7.01072	-8.04458	7
Alcidae (Fratercula and Cerorhinca, Ptychoramphus and Aethia)	Friesen et al 1996; following Weir & Schulter 2008	Becker 1987	10250000	9.24878e-09	Fossil	cyt b	coding	bird		7.01072	-8.03392	7
Alcidae (Pinguinus, Alca)	Moum et al. 2002; following Weir & Schulter 2008	Becker 1987	4500000	1.52333e-08	Fossil	cyt b	coding	bird		6.65321	-7.81721	6
Alcidae (Uria, Alle, Pinguinus, Alca)	Moum et al. 2002; following Weir & Schulter 2008	Becker 1987	10250000	8.64878e-09	Fossil	cyt b	coding	bird		7.01072	-8.06305	7
Anatidae (Anas (Mallard clade), Anas (Green-winged Teal clade))	Johnson & Sorenson 1998; following Weir & Schulter 2008	Becker 1987	3500000	1.04252e-08	Fossil	cyt b	coding	bird		6.54407	-7.98192	6
Anatidae (Anser*, Branta)	Shields & Wilson 1987, Paxinos et al. 2002; following Weir & Schulter 2008	Boev & Koufos 2006	7150000	8.83217e-09	Fossil	cyt b	coding	bird		6.85431	-8.05393	6
Anatidae (Branta bernicla, B. ruficollis)	Paxinos et al 2002; following Weir & Schulter 2008	Olson & Rasmussen 2001	4250000	1.36526e-08	Fossil	cyt b	coding	bird		6.62839	-7.86479	6
Anatidae (Branta sp. (Giant Hawaiian Goose), B. hylobadistes)	Paxinos et al 2002; following Weir & Schulter 2008	Carson & Calgue 1995	430000	2.45349e-08	Biogeographic (island)	cyt b	coding	bird		5.63347	-7.61022	5
Anatidae (Bucephala, Mergellus, Lophodytes and Mergus)	Donne-Gousse et al 2002; following Weir & Schulter 2008	Becker 1987	5250000	1.31709e-08	Fossil	cyt b	coding	bird		6.72016	-7.88039	6
Anatidae (Cygnus and Coscoroba, Branta and Anser)	Donne-Gousse et al 2002; following Weir & Schulter 2008	Mlikovsky 2002	11900000	8.76975e-09	Fossil	cyt b	coding	bird		7.07555	-8.05701	7
Anatidae (Histrionicus, Somateria)	Weir & Schulter 2008	Becker 1987	9500000	6.23e-09	Fossil	cyt b	coding	bird		6.97772	-8.20551	6
Anatidae (Thambetochen (Moa-Nalos), dabbling ducks (Anatini))	Sorenson et al. 1999; following Weir & Schulter 2008	Carson & Calgue 1995	5100000	1.38627e-08	Biogeographic	cyt b	coding	bird		6.70757	-7.85815	6
Ardeidae (Botuarus, Ixobrychus)	Sheldon et al 2000; following Weir & Schulter 2008	Becker 1987	3300000	2.09091e-08	Fossil	cyt b	coding	bird		6.51851	-7.67966	6
Ardeidae (Egretta, Syrigma)	Sheldon et al 2000; following Weir & Schulter 2008	Becker 1987	9000000	7.83166e-09	Fossil	cyt b	coding	bird		6.95424	-8.10615	6
Ardeidae (Nycticorax, Nyctanassa)	Sheldon et al 2000; following Weir & Schulter 2008	Becker 1987	8000000	1.19812e-08	Fossil	cyt b	coding	bird		6.90309	-7.9215	6
Asian francolins (Galliformes)	Forcina et al. 2012		41200000	4e-09	fossil	d-loop	non-coding	bird		7.6149	-8.39794	7
Birds	Nabholz et al. 2009		77000000	1.8e-08	fossil	cyt b (3rd codon position only)	non-coding	bird		7.88649	-7.74473	7
Birds (Neoaves)	Pacheco et al. 2011		85000000	4.09333e-09	biogeography	mitogenome (most genes, no d-loop)	coding	bird		7.92942	-8.38792	7
															Birds (Neoaves)	Pacheco et al. 2011	85000000	3.9e-09	biogeography	ND1	coding	bird		7.92942	-8.40894
															Birds (Neoaves)	Pacheco et al. 2011	85000000	6.8e-09	biogeography	ND2	coding	bird		7.92942	-8.16749
															Birds (Neoaves)	Pacheco et al. 2011	85000000	2.7e-09	biogeography	COI	coding	bird		7.92942	-8.56864
															Birds (Neoaves)	Pacheco et al. 2011	85000000	5e-09	biogeography	COII	coding	bird		7.92942	-8.30103
															Birds (Neoaves)	Pacheco et al. 2011	85000000	4.7e-09	biogeography	ATP8	coding	bird		7.92942	-8.3279
															Birds (Neoaves)	Pacheco et al. 2011	85000000	5.9e-09	biogeography	ATP6	coding	bird		7.92942	-8.22915
															Birds (Neoaves)	Pacheco et al. 2011	85000000	3e-09	biogeography	COIII	coding	bird		7.92942	-8.52288
															Birds (Neoaves)	Pacheco et al. 2011	85000000	4.2e-09	biogeography	ND3	coding	bird		7.92942	-8.37675
															Birds (Neoaves)	Pacheco et al. 2011	85000000	4.5e-09	biogeography	ND4L (or ND4)	coding	bird		7.92942	-8.34679
															Birds (Neoaves)	Pacheco et al. 2011	85000000	4.5e-09	biogeography	ND4L (or ND4)	coding	bird		7.92942	-8.34679
															Birds (Neoaves)	Pacheco et al. 2011	85000000	3.8e-09	biogeography	ND5	coding	bird		7.92942	-8.42022
															Birds (Neoaves)	Pacheco et al. 2011	85000000	3.3e-09	biogeography	cyt b	coding	bird		7.92942	-8.48149
															Birds (Neoaves)	Pacheco et al. 2011	85000000	2.4e-09	biogeography	tRNA	coding	bird		7.92942	-8.61979
															Birds (Neoaves)	Pacheco et al. 2011	85000000	3.2e-09	biogeography	12S	coding	bird		7.92942	-8.49485
															Birds (Neoaves)	Pacheco et al. 2011	85000000	3.5e-09	biogeography	16S	coding	bird		7.92942	-8.45593
Cardinalidae (Passerina, Cyanocompsa)	Klicka et al 2001; following Weir & Schulter 2008	Becker 1987	5250000	1.52267e-08	Fossil	cyt b	coding	bird		6.72016	-7.8174	6
Chinese bamboo partridge	Huang et al. 2010		2000000	1.075e-08	secondary from d-loop analyses (paper in chinese)	d-loop	non-coding	bird		6.30103	-7.96859	6
Ciconiidae (Ciconia, all storks but Mycteria)	Weir & Schulter 2008	Becker 1987	9000000	8.73339e-09	Fossil	cyt b	coding	bird		6.95424	-8.05882	6
Ciconiidae (Ephippiorhynchus asiaticus, E. senigalensis)	Weir & Schulter 2008	Boles 2005	4240000	1.50904e-08	Fossil	cyt b	coding	bird		6.62737	-7.8213	6
Ciconiidae (Mycteria, all other storks)	Weir & Schulter 2008	Becker 1987, Olson 1991	9500000	8.75018e-09	Fossil	cyt b	coding	bird		6.97772	-8.05798	6
Columbidae (Raphus, Caloenas)	Shapiro et al 2002; following Weir & Schulter 2008	McDougall & Chamalaun 1969	7800000	1.03654e-08	Biogeographic	cyt b	coding	bird		6.89209	-7.98441	6
Columbidae (Zenaida galapagoensis, Z. auriculata, macroura, graysoni)	Johnson & Clayton 2000; following Weir & Schulter 2008	Hall 1983	3300000	9.65152e-09	Biogeographic	cyt b	coding	bird		6.51851	-8.0154	6
Columbidae (Zenaida graysoni, Z. macroura)	Johnson & Clayton 2000; following Weir & Schulter 2008	Bohrson & Reid 1997	540000	9.44444e-09	Biogeographic	cyt b	coding	bird		5.73239	-8.02482	5
Cranes	Krajewski & King 1996		20000000	1.2e-08	fossil	cyt b	coding	bird		7.30103	-7.92082	7
Cuculidae (Coccyzus melacoryphus, C. americanus, C. euleri, C. minor (sequences only available for americanus))	Hughes 2006; following Weir & Schulter 2008	Hall 1983	3300000	5.14045e-09	Biogeographic	cyt b	coding	bird		6.51851	-8.289	6
Dendrocolaptidae (Lepidocolaptes leucogaster and affinis, L. lachrymosus)	Weir & Schulter 2008	Coates & Obando 1996	3500000	1.30286e-08	Biogeographic	cyt b	coding	bird		6.54407	-7.8851	6
Diomedeidae (Phoebastria irrorata, P. nigripes, immutabilis, albatrus)	Nunn and Stanley 1998; following Weir & Schulter 2008	Hall 1983	3300000	7.56061e-09	Biogeographic	cyt b	coding	bird		6.51851	-8.12144	6
Diomedeidae (Thalassarche, Phoebetria)	Nunn et al 1996; following Weir & Schulter 2008	Wilkinson 1969	5300000	1.10094e-08	Fossil	cyt b	coding	bird		6.72428	-7.95824	6
Emberizidae (Chlorospingus pileatus, C. ophthalmicus, inornatus, tacarcunae, semifuscus)	Weir et al 2008; following Weir & Schulter 2008	Grafe et al. 2002	4500000	8.64444e-09	Biogeographic	cyt b	coding	bird		6.65321	-8.06326	6
Emberizidae (Emberizidae, Cardinalidae and Thraupidae)	Barker et al. 2004; following Weir & Schulter 2008	Becker 1987	8000000	1.3525e-08	Fossil	cyt b	coding	bird		6.90309	-7.86886	6
Emberizidae (JunCO+ Zonotrichia)	Carson & Spicer 2003; following Weir & Schulter 2008	Emslie 2007	4550000	8.38901e-09	Fossil	cyt b	coding	bird		6.65801	-8.07629	6
Emberizidae (Melospiza melodia, M. georgiana and M. lincolnii)	Carson & Spicer 2003; following Weir & Schulter 2008	Becker 1987	2000000	1.4125e-08	Fossil	cyt b	coding	bird		6.30103	-7.85001	6
Emberizidae (Zonotrichia albicollis, Z. leucophrys, atricapilla, querula)	Weckstein et al 2001; following Weir & Schulter 2008	Becker 1987	2000000	6.89061e-09	Fossil	cyt b	coding	bird		6.30103	-8.16174	6
Falconidae (FalCOpunctatus, F. araea, newtoni)	Groombridge et al 2002; following Weir & Schulter 2008	McDougall & Chamalaun 1969	7800000	2.57756e-09	Biogeographic	cyt b	coding	bird		6.89209	-8.58879	6
Fringillidae (Hemignathus flavus, H. v. wilsonia)	Fleischer et al. 1998; following Weir & Schulter 2008	Carson & Calgue 1995	1600000	9e-09	Biogeographic	cyt b	coding	bird		6.20412	-8.04576	6
Fringillidae (Hemignathus virens wilsonia*, H. v. virens)	Fleischer et al. 1998; following Weir & Schulter 2008	Carson & Calgue 1995	430000	7.67442e-09	Biogeographic	cyt b	coding	bird		5.63347	-8.11495	5
Fringillidae (Paroreomyza, Oreomystis bairdi)	Fleischer et al. 1998; following Weir & Schulter 2008	Carson & Calgue 1995	3700000	1.03108e-08	Biogeographic	cyt b	coding	bird		6.5682	-7.98671	6
Gruidae (Grus americana, G. grus, G. monachus, G. nigricollis)	Krajewski & King 1996; following Weir & Schulter 2008	Becker 1987	4200000	4.04762e-09	Fossil	cyt b	coding	bird		6.62325	-8.3928	6
Hawaian honeycreepers	Fleischer et al. 1998		3700000	8e-09	biogeography (islands)	cyt b	coding	bird		6.5682	-8.09691	6
Hume's ground tit (Pseudopodoces humilis)	Qu and Lei 2009		3600000	1.05e-08	biogeography	cyt b, COI	coding	bird		6.5563	-7.97881	6
Hydrobatidae (Oceanodroma crown group, )	Nunn and Stanley 1998; following Weir & Schulter 2008	Becker 1987	10250000	9.71707e-09	Fossil	cyt b	coding	bird		7.01072	-8.01246	7
Icteridae (Agelaius phoeniceus, A. tricolor)	Lanyon & Omland 1999; following Weir & Schulter 2008	Emslie 1998	2500000	1.87e-08	Fossil	cyt b	coding	bird		6.39794	-7.72816	6
Icteridae (Cacicus [uropygialis] microrhynchus, C. [uropygialis] pacificus and C. uropygialis)	Weir & Schulter 2008	Coates & Obando 1996	3500000	1.05686e-08	Biogeographic	cyt b	coding	bird		6.54407	-7.97598	6
Icteridae (Dives dives, D. warszewiczi)	Weir & Schulter 2008	Coates & Obando 1996	3500000	7.55429e-09	Biogeographic	cyt b	coding	bird		6.54407	-8.12181	6
Icteridae (Euphagus cyanocephalus, E. carolinus)	Lanyon & Omland 1999; following Weir & Schulter 2008	Emslie 1998	2000000	1.1625e-08	Fossil	cyt b	coding	bird		6.30103	-7.93461	6
Icteridae (Icterus gularis, I. nigrogularis)	Omland et al. 1999; following Weir & Schulter 2008	Coates & Obando 1996	3100000	5.7871e-09	Biogeographic (landbridge)	cyt b	coding	bird		6.49136	-8.23754	6
Icteridae (Icterus pectoralis, I. graceannae)	Weir & Schulter 2008	Coates & Obando 1996	3500000	1.33429e-08	Biogeographic	cyt b	coding	bird		6.54407	-7.87475	6
Icteridae (Molothrus ater, M. bonariensis)	Lanyon & Omland 1999; following Weir & Schulter 2008	Emslie 1998	2000000	2.55821e-09	Fossil	cyt b	coding	bird		6.30103	-8.59206	6
Icteridae (Quiscalus nicaraguensis, Q. lugubris)	Weir & Schulter 2008	Coates & Obando 1996	3100000	5.15774e-09	Biogeographic (landbridge)	cyt b	coding	bird		6.49136	-8.28754	6
Icteridae (Sturnella magna, S. neglecta)	Lanyon & Omland 1999; following Weir & Schulter 2008	Emslie 1998	2000000	1.2305e-08	Fossil	cyt b	coding	bird		6.30103	-7.90992	6
Icteridae (Sturnella magna and neglecta, remainder of Sturnella (including Leistes))	Lanyon & Omland 1999; following Weir & Schulter 2008	Emslie 2007	4600000	1.59891e-08	Fossil	cyt b	coding	bird		6.66276	-7.79618	6
Laridae (Rissa tridactyla, R. brevirostris)	Pons et al 2005; following Weir & Schulter 2008	Chandler 1990	2500000	1.27668e-08	Fossil	cyt b	coding	bird		6.39794	-7.89392	6
Mockingbirds	Arbogast et al. 2006		400000	6.1e-08	biogeographic	ND2	coding	bird		5.60206	-7.21467	5
Mockingbirds	Arbogast et al. 2006		1000000	2.1e-08	biogeographic	ND2	coding	bird		6	-7.67778	6
Nectariniidae (Nectarinia humbloti*, N. h. mohelica)	Warren et al 2003; following Weir & Schulter 2008	Warren et al 2003	500000	5.31e-08	Biogeographic (island)	cyt b	coding	bird		5.69897	-7.27491	5
Nectariniidae (Nectarinia sovimanga*, N. s. sovimanga)	Warren et al 2003; following Weir & Schulter 2008	Warren et al 2003	125000	1.72e-08	Biogeographic (island)	cyt b	coding	bird		5.09691	-7.76447	5
Odontophoridae (Callipepla, Colinus)	Zink & Blackwell 1998, Crow et al 2006; following Weir & Schulter 2008	Becker 1987	5250000	1.19143e-08	Fossil	cyt b	coding	bird		6.72016	-7.92393	6
Parulidae (Myioborus torquatus, M. brunniceps)	Perez-Eman 2005; following Weir & Schulter 2008	Coates & Obando 1996	3500000	1.29125e-08	Biogeographic	cyt b	coding	bird		6.54407	-7.88899	6
Parulidae (Parula gutturalis, P. superciliosa)	Lovette & Bermingham 2001; following Weir & Schulter 2008	Grafe et al. 2002	4500000	6.7122e-10	Biogeographic (highland)	cyt b	coding	bird		6.65321	-9.17314	6
Parulidae (Vermivora celata, V. ruficapilla, virginiae, crissalis, luciae)	Lovette & Hochachka 2006; following Weir & Schulter 2008	Emslie 1998	2000000	5.99765e-09	Fossil	cyt b	coding	bird		6.30103	-8.22202	6
Phasianidae birds	Huang et al. 2009		1900000	1.63e-08	secondary calibration based on bichemical and molecular dating	d-loop	non-coding	bird		6.27875	-7.78781	6
Picidae (Sasia abnormis, S. ochracea)	Benz et al 2006; following Weir & Schulter 2008	Benz et al 2006	5000000	1.48127e-08	Biogeographic	cyt b	coding	bird		6.69897	-7.82936	6
Psittacidae (Melopsittacus, Psittaculirostris)	Weir & Schulter 2008	Boles 1998	5500000	1.70064e-08	Fossil	cyt b	coding	bird		6.74036	-7.76939	6
Pteroglossus araçaris (AVES: Ramphastidae)	Patel et al. 2011		4500000	2.96e-08	biogeography	COI, cyt b, ND2	coding	bird		6.65321	-7.52871	6
															Pteroglossus araçaris (AVES: Ramphastidae)	Patel et al. 2011	4500000	2.355e-08	biogeography	COI	coding	bird		6.65321	-7.62801
															Pteroglossus araçaris (AVES: Ramphastidae)	Patel et al. 2011	4500000	3.1e-08	biogeography	cyt b	coding	bird		6.65321	-7.50864
															Pteroglossus araçaris (AVES: Ramphastidae)	Patel et al. 2011	4500000	3.425e-08	biogeography	ND2	coding	bird		6.65321	-7.46534
Ramphastidae (Semnornis frantzii, S. ramphastinus)	Weir & Schulter 2008	Coates & Obando 1996	3500000	1.81714e-08	Biogeographic	cyt b	coding	bird		6.54407	-7.74061	6
Ramphastos toucans	Patane et al. 2009		4500000	2.61467e-08	biogeographic, Weir & Schluter based prior on rate	COI, cyt b, ND2	coding	bird		6.65321	-7.58258	6
															Ramphastos toucans	Patane et al. 2009	4500000	1.549e-08	biogeographic, Weir & Schluter based prior on rate	COI	coding	bird		6.65321	-7.80995
															Ramphastos toucans	Patane et al. 2009	4500000	3.035e-08	biogeographic, Weir & Schluter based prior on rate	cyt b	coding	bird		6.65321	-7.51784
															Ramphastos toucans	Patane et al. 2009	4500000	3.26e-08	biogeographic, Weir & Schluter based prior on rate	ND2	coding	bird		6.65321	-7.48678
Recurvirostridae (Himantopus and Cladorhynchus, Recurvirostra)	Baker et al 2007; following Weir & Schulter 2008	Becker 1987	5200000	7.94615e-09	Fossil	cyt b	coding	bird		6.716	-8.09984	6
ring-necked pheasant (Phasianus colchicus)	Qu et al. 2009		2220000	1.95e-08	fossil	d-loop	non-coding	bird		6.34635	-7.70997	6
Scolpanidae (Actitis macularia, A. hypoleucos)	Pereira & Baker 2005; following Weir & Schulter 2008	Becker 1987	9000000	1.36522e-08	Fossil	cyt b	coding	bird		6.95424	-7.8648	6
Scolpanidae (Limosa, everything else in family except Bartramia and Numenius)	Baker et al 2007; following Weir & Schulter 2008	Becker 1987	10250000	1.25555e-08	Fossil	cyt b	coding	bird		7.01072	-7.90117	7
Scolpanidae (Micropalama, Trygnites)	Baker et al 2007; following Weir & Schulter 2008	Becker 1987	3100000	1.94839e-08	Fossil	cyt b	coding	bird		6.49136	-7.71032	6
Scolpanidae (Numenius, Bartramia)	Baker et al 2007; following Weir & Schulter 2008	Baker et al 2007	11600000	1.04289e-08	Fossil	cyt b	coding	bird		7.06446	-7.98176	7
Scolpanidae (Philomachus, Limicola)	Baker et al 2007; following Weir & Schulter 2008	Becker 1987	5250000	1.24667e-08	Fossil	cyt b	coding	bird		6.72016	-7.90425	6
Scolpanidae (Tringa solitaria, T. ochropus)	Pereira & Baker 2005; following Weir & Schulter 2008	Becker 1987	4250000	2.15412e-08	Fossil	cyt b	coding	bird		6.62839	-7.66673	6
Skua (Stercorarius parasiticus, S. longicaudus)	Cohen et al 1997; following Weir & Schulter 2008	Olson & Rasmussen 2001	4250000	1.33447e-08	Fossil	cyt b	coding	bird		6.62839	-7.87469	6
South American forest falcons	Fuchs et al. 2011		23700000	1.745e-08	fossil	ND1, ND2	coding	bird		7.37475	-7.7582	7
															South American forest falcons	Fuchs et al. 2011	23700000	1.82e-08	fossil	ND1	coding	bird		7.37475	-7.73993
															South American forest falcons	Fuchs et al. 2011	23700000	1.67e-08	fossil	ND2	coding	bird		7.37475	-7.77728
Spheniscidae (Spheniscus, Eudyptula)	Baker et al 2006; following Weir & Schulter 2008	Gohlich 2007	12000000	6.43806e-09	Fossil	cyt b	coding	bird		7.07918	-8.19124	7
Spheniscidae (Spheniscus mendiculus, S. humboldti)	Baker et al 2006; following Weir & Schulter 2008	Hall 1983	3300000	1.47197e-09	Biogeographic (island)	cyt b	coding	bird		6.51851	-8.8321	6
Sternidae (Gelochelidon nilotica, Hydroprogne caspia)	Bridge et al 2005; following Weir & Schulter 2008	Olson & Rasmussen 2001	4250000	1.60706e-08	Fossil	cyt b	coding	bird		6.62839	-7.79397	6
Sternidae (Thalasseus maxima, T. bengalensis, T. bergii, T. sandvicensis, T. elegans)	Bridge et al 2005; following Weir & Schulter 2008	Olson & Rasmussen 2001	4250000	1.18521e-08	Fossil	cyt b	coding	bird		6.62839	-7.9262	6
Sylviidae (Sylvia balearica*, S. undata, deserticola)	Bohning-Gaese et al. 2006; following Weir & Schulter 2008	Krijgsman et al. 1999	5330000	4.75891e-09	Biogeographic	cyt b	coding	bird		6.72673	-8.32249	6
Sylviidae (Sylvia rueppelli*, S. melanothorax)	Bohning-Gaese et al. 2006; following Weir & Schulter 2008	Krijgsman et al. 1999	5330000	8.06191e-09	Biogeographic	cyt b	coding	bird		6.72673	-8.09356	6
Thraupidae (Diglossa baritula and plumbea, D. sittoides)	Weir & Schulter 2008	Coates & Obando 1996	3500000	1.07743e-08	Biogeographic	cyt b	coding	bird		6.54407	-7.96761	6
Thraupidae (Galapagos finches, Tiaris fuliginosa, T. obscura, T. bicolor, T.canora, Melanospiza richardsoni, Loxigilla noctis)	Burns et al 2002, Weir & Schulter 2008	Hall 1983	3300000	8.02576e-09	Biogeographic	cyt b	coding	bird		6.51851	-8.09551	6
Thraupidae (Heterospingus rubrifrons, H. xanthopygius)	Weir & Schulter 2008	Coates & Obando 1996	3500000	4.51e-09	Biogeographic (landbridge)	cyt b	coding	bird		6.54407	-8.34582	6
Thraupidae (Lanio aurantius and leucothorax, L. fulvus and versicolor)	Weir & Schulter 2008	Coates & Obando 1996	3500000	1.15886e-08	Biogeographic	cyt b	coding	bird		6.54407	-7.93597	6
Thraupidae (Ramphocelus passerini and costaricensis, R. icteronotus)	Weir & Schulter 2008	Coates & Obando 1996	3500000	8.64e-09	Biogeographic	cyt b	coding	bird		6.54407	-8.06349	6
Thraupidae (Saltator [coerulescens] grandis, S. coerulescens, S. albicollis)	Weir & Schulter 2008	Coates & Obando 1996	3500000	1.11857e-08	Biogeographic	cyt b	coding	bird		6.54407	-7.95134	6
Thraupidae (Saltator atriceps, S. maximus)	Weir & Schulter 2008	Coates & Obando 1996	3500000	9.10614e-09	Biogeographic	cyt b	coding	bird		6.54407	-8.04067	6
Thraupidae (Tangara dowii, T. nigroviridis)	Burns & Naoki 2004, Weir & Schulter 2008	Coates & Obando 1996	3500000	1.09829e-08	Biogeographic	cyt b	coding	bird		6.54407	-7.95928	6
Tits (Paridae)	Päckert et al. 2007		5960000	5.9e-08	biogeography	cyt b	coding	bird		6.77525	-7.22915	6
Trochilidae (Lampornis castaneoventris, L. sybillae and L. viridipallens)	Garcia-Moreno et al. 2006; following Weir & Schulter 2008	Grafe et al. 2002	4500000	8.61778e-09	Biogeographic	cyt b	coding	bird		6.65321	-8.0646	6
Turdidae (Catharus gracilirostris, C. occidentalis and guttatus)	Winker & Pruett 2006; following Weir & Schulter 2008	Grafe et al. 2002	4500000	1.24467e-08	Biogeographic	cyt b	coding	bird		6.65321	-7.90495	6
Turdidae (Myadestes melanops, M. coloratus)	Miller et al 2007; following Weir & Schulter 2008	Coates & Obando 1996	3500000	9.45714e-09	Biogeographic	cyt b	coding	bird		6.54407	-8.02424	6
Turdidae (Myadestes obscurus, M. unicolor, genibarbis, elisabeth, occidentalis)	Miller et al 2007; following Weir & Schulter 2008	Carson & Calgue 1995	5100000	1.26176e-08	Biogeographic	cyt b	coding	bird		6.70757	-7.89902	6
Turkey	this study	Speller et al. 2010	1250	1.7078e-06	aDNA	d-loop	non-coding	bird		3.09691	-5.76756	3
Tyrannidae (Empidonax atriceps, E. fulvifrons)	Johnson & Cicero 2002; following Weir & Schulter 2008	Grafe et al. 2002	4500000	3.83333e-09	Biogeographic (highland)	cyt b	coding	bird		6.65321	-8.41642	6
Western Indian Ocean sunbirds (Nectariniidae)	Warren et al. 2003		500000	6.85e-08	biogeography	ATPase6, ND3, cyt b	coding	bird		5.69897	-7.16431	5
White-rumped snow finch (Onychostruthus taczanowskii)	Qu and Lei 2009		2500000	1.39e-08	biogeography	cyt b and COI	coding	bird		6.39794	-7.85699	6
Woodpecker genera Colaptes and Piculus	Moore et al 2011		5000000	1.1e-08	biogeography	cyt b	coding	bird		6.69897	-7.95861	6
Alaska tiny shrews (Soricidae)	Hope et al. 2010		1200000	5.5e-08	biogeography	cyt b	coding	mammal		6.07918	-7.25964	6
Arctic fox	Molak et al. 2013	Dalen et al 2007	16000	6.1838e-07	aDNA	d-loop	non-coding	mammal		4.20412	-6.20874	4
Arctic fox (Vulpes lagopus, Canis lupus lupus)	this study	Flynn & Galliano 1982, Wayne et al. 1997	52000000	3.2516e-09	fossil	d-loop	non-coding	mammal		7.716	-8.4879	7
Aurochs	this study	Edwards et al. 2007	12300	8.1879e-07	aDNA	d-loop	non-coding	mammal		4.08991	-6.08683	4
Aurochs (Bos primigenius, Bison bison)	this study	Tedford et al. 1991, Barry at al. 2002 following Ho et al. 2008	8900000	5.6616e-08	fossil	d-loop	non-coding	mammal		6.94939	-7.24706	6
Baleen whales	Jackson et al. 2009		12000000	5.85e-08	fossil	d-loop	non-coding	mammal		7.07918	-7.23284	7
Bison	Molak et al. 2013	Shapiro et al. 2004	60400	4.2011e-07	aDNA	d-loop	non-coding	mammal		4.78104	-6.37664	4
Bison (Bison priscus, Bos grunniens)	this study	Tedford et al. 1991, Barry at al. 2002 following Ho et al. 2008	8900000	2.1053e-07	fossil	d-loop	non-coding	mammal		6.94939	-6.67669	6
Blue whale and fin whale	Pesole et al. 1999		5000000	1.038e-08	fossil	mitogenome (coding only)	coding	mammal		6.69897	-7.9838	6
															Blue whale and fin whale	Pesole et al. 1999	5000000	3.6e-09	fossil	tRNAs	coding	mammal		6.69897	-8.4437
															Blue whale and fin whale	Pesole et al. 1999	5000000	6.1e-09	fossil	12S rRNA	coding	mammal		6.69897	-8.21467
															Blue whale and fin whale	Pesole et al. 1999	5000000	4.5e-09	fossil	16SrRNA	coding	mammal		6.69897	-8.34679
															Blue whale and fin whale	Pesole et al. 1999	5000000	1.2e-09	fossil	protein coding genes nonsyn	coding	mammal		6.69897	-8.92082
															Blue whale and fin whale	Pesole et al. 1999	5000000	3.65e-08	fossil	protein coding genes syn	neutral coding	mammal		6.69897	-7.43771
Blue whale and fin whale	Pesole et al. 1999		5000000	1.42e-08	fossil	d-loop	non-coding	mammal		6.69897	-7.84771	6
Boar	Molak et al. 2013	Watanobe et al. 2001, Watanobe et al. 2004	5400	2.2958e-06	aDNA	d-loop	non-coding	mammal		3.73239	-5.63907	3
Bowhead whale	this study	Foote et al. 2013	51000	3.64e-07	aDNA	d-loop	non-coding	mammal		4.70757	-6.4389	4
Bowhead whale	Rooney et al. 2001		3400000	1.8e-08	fossil	d-loop	non-coding	mammal		6.53148	-7.74473	6
Brown bear	Molak et al. 2013	Korsten et al 2009, Lindquist et al. 2010	120000	7.0032e-07	aDNA	d-loop	non-coding	mammal		5.07918	-6.1547	5
Brown bear (Ursus arctos, Ursus spelaeus)	this study	Korsten et al. 2009	1450000	3.9227e-07	fossil	d-loop	non-coding	mammal		6.16137	-6.40641	6
Cape buffalo (Syncerus caffer caffer)	Heller et al. 2012		7700000	3.1e-08	secondary calibration based on genetic inference calibrated with fossil record	mitogenome	coding	mammal		6.88649	-7.50864	6
Cave bear	Korsten et al. 2009		1450000	3.11e-07	cave-brown bear split+aDNA	d-loop	non-coding	mammal		6.16137	-6.50724	6
Cave lion	Molak et al. 2013	Barnett et al 2009	46275	5.4258e-07	aDNA	d-loop	non-coding	mammal		4.66535	-6.26554	4
Cave lion (Panthera leo spelaea, Panthera leo leo)	this study	Barnett et al. 2009	550000	7.7349e-08	fossil	d-loop	non-coding	mammal		5.74036	-7.11155	5
Cetaceans	Ho and Lanfear 2010		36000000	2e-08	fossil	mitogenome (only coding)	coding	mammal		7.5563	-7.69897	7
Cow	this study	Bollongino et al. 2006	8065	6.72e-07	aDNA	d-loop	non-coding	mammal		3.9066	-6.17263	3
Cow (Bos taurus, bison bison)	this study	Tedford et al. 1991, Barry at al. 2002 following Ho et al. 2008	8900000	1.02e-07	fossil	d-loop	non-coding	mammal		6.94939	-6.9914	6
Gray whales	Alter et al. 2007		27300000	4e-09	fossil supported by molecular	cyt b	coding	mammal		7.43616	-8.39794	7
Harbor seal and gray seal	Pesole et al. 1999		2700000	6.68e-09	biogeography, molecular	mitogenome (only coding)	coding	mammal		6.43136	-8.17522	6
															Harbor seal and gray seal	Pesole et al. 1999	2700000	2.8e-09	biogeography, molecular	tRNAs	coding	mammal		6.43136	-8.55284
															Harbor seal and gray seal	Pesole et al. 1999	2700000	3.5e-09	biogeography, molecular	12S rRNA	coding	mammal		6.43136	-8.45593
															Harbor seal and gray seal	Pesole et al. 1999	2700000	4.3e-09	biogeography, molecular	16SrRNA	coding	mammal		6.43136	-8.36653
															Harbor seal and gray seal	Pesole et al. 1999	2700000	1.5e-09	biogeography, molecular	protein coding genes nonsyn	coding	mammal		6.43136	-8.82391
															Harbor seal and gray seal	Pesole et al. 1999	2700000	2.13e-08	biogeography, molecular	protein coding genes syn	neutral coding	mammal		6.43136	-7.67162
harbor seal and gray seal	Pesole et al. 1999		2700000	8.9e-09	biogeography, molecular	d-loop	non-coding	mammal		6.43136	-8.05061	6
Horse	Molak et al. 2013	Lorenzen et al 2011	41680	7.4748e-07	aDNA	d-loop	non-coding	mammal		4.61993	-6.1264	4
Horse	this study	Lorenzen et al 2011, Steiner & Ryder 2011	4000000	2.0928e-07	fossil	d-loop	non-coding	mammal		6.60206	-6.67927	6
Horse and donkey	Pesole et al. 1999		4000000	8.7e-09	fossil	mitogenome	coding	mammal		6.60206	-8.06048	6
															Horse and donkey	Pesole et al. 1999	4000000	3.4e-09	fossil	tRNAs	coding	mammal		6.60206	-8.46852
															Horse and donkey	Pesole et al. 1999	4000000	4.5e-09	fossil	12S rRNA	coding	mammal		6.60206	-8.34679
															Horse and donkey	Pesole et al. 1999	4000000	5.3e-09	fossil	16SrRNA	coding	mammal		6.60206	-8.27572
															Horse and donkey	Pesole et al. 1999	4000000	1.5e-09	fossil	protein coding genes nonsyn	coding	mammal		6.60206	-8.82391
															Horse and donkey	Pesole et al. 1999	4000000	2.88e-08	fossil	protein coding genes syn	neutral coding	mammal		6.60206	-7.54061
Horse and donkey	Pesole et al. 1999		4000000	6.5e-09	fossil	d-loop	non-coding	mammal		6.60206	-8.18709	6
Human	Stoneking et al. 1992		60000	1.18e-07	biogeography/archaeology	HVRI and HVRII	non-coding	mammal		4.77815	-6.92812	4	ISA
Human	Kemp et al. 2007		10300	4.4e-07	fossil	HVRI	non-coding	mammal		4.01284	-6.35655	4	ISA
Human	Endicott and Ho 2008		45000	9.66e-08	biogeography	mitogenome (only coding)	coding	mammal		4.65321	-7.01502	4
Human	Endicott and Ho 2008		45000	3.02e-07	biogeography	d-loop	non-coding	mammal		4.65321	-6.51999	4	ISA
Human	average from: Endicott and Ho 2008, Pesole et al. 1999		6000000	2.83133e-08	fossil	mitogenome (coding only)	coding	mammal		6.77815	-7.54801	6
																sub-average	6000000	8.38e-09
															Human and Pan paniscus	Pesole et al. 1999	6000000	3.6e-09	fossil, molecular	tRNAs	coding	mammal		6.77815	-8.4437
															Human and Pan paniscus	Pesole et al. 1999	6000000	2.7e-09	fossil, molecular	12S rRNA	coding	mammal		6.77815	-8.56864
															Human and Pan paniscus	Pesole et al. 1999	6000000	5.6e-09	fossil, molecular	16SrRNA	coding	mammal		6.77815	-8.25181
															Human and Pan paniscus	Pesole et al. 1999	6000000	2e-09	fossil, molecular	protein coding genes nonsyn	coding	mammal		6.77815	-8.69897
															Human and Pan paniscus	Pesole et al. 1999	6000000	2.8e-08	fossil, molecular	protein coding genes syn	neutral coding	mammal		6.77815	-7.55284
																sub-average	6000000	8.46e-09
															Human and Pan troglodytes	Pesole et al. 1999	6000000	3.3e-09	fossil, molecular	tRNAs	coding	mammal		6.77815	-8.48149
															Human and Pan troglodytes	Pesole et al. 1999	6000000	3.2e-09	fossil, molecular	12S rRNA	coding	mammal		6.77815	-8.49485
															Human and Pan troglodytes	Pesole et al. 1999	6000000	4.8e-09	fossil, molecular	16SrRNA	coding	mammal		6.77815	-8.31876
															Human and Pan troglodytes	Pesole et al. 1999	6000000	2.2e-09	fossil, molecular	protein coding genes nonsyn	coding	mammal		6.77815	-8.65758
															Human and Pan troglodytes	Pesole et al. 1999	6000000	2.88e-08	fossil, molecular	protein coding genes syn	neutral coding	mammal		6.77815	-7.54061
																sub-average	6000000	6.81e-08
															Human	Endicott and Ho 2008	6000000	6.81e-08	fossil	mitogenome (only coding)	coding	mammal		6.77815	-7.16685
Human	Brotherton et al. 2013		5450	2.4e-08	aDNA	entire mitogenome	coding	mammal		3.7364	-7.61979	3
Human	this study	Fu et al. 2013	40000	1.5639e-07	aDNA	d-loop	non-coding	mammal		4.60206	-6.80579	4	ISA
Human	Fu et al. 2013		40000	1.57e-08	aDNA	mitogenome (coding only)	coding	mammal		4.60206	-7.8041	4
Human	average from: Endicott and Ho 2008 (fossil calibrated dloop), Hasegawa and Horai 1991, Horai et al. 1995, Pesole et al. 1992, Pesole et al. 1999, Tamura and Nei 1993, Vigilant et al. 1991, this study based on Fu et al. 2013 and chimpanzee sequence and divergence calibration		5.82222e+06	1.01964e-07	fossil	d-loop	non-coding	mammal		6.76509	-6.99155	6
													ISA		Human	Endicott and Ho 2008	6000000	2.13e-07	fossil	dloop	non-coding	mammal		6.77815	-6.67162
													ISA		Human	Hasegawa and Horai 1991	4000000	2.315e-07	fossil	HVRI and HVRII	non-coding	mammal		6.60206	-6.63545
													ISA		Human	Horai et al. 1995	4900000	7e-08	fossil	HVRI and HVRII	non-coding	mammal		6.6902	-7.1549
													ISA		Human	Pesole et al. 1992	7500000	1.8e-07	fossil	HVRI and HVRII	non-coding	mammal		6.87506	-6.74473
													ISA		Human and Pan paniscus	Pesole et al. 1999	6000000	1.37e-08	fossil + molecular	d-loop	non-coding	mammal		6.77815	-7.86328
													ISA		Human and Pan troglodytes	Pesole et al. 1999	6000000	1.33e-08	fossil + molecular	d-loop	non-coding	mammal		6.77815	-7.87615
													ISA		Human	Tamura and Nei 1993	6000000	2.5e-08	fossil	HVRI and HVRII	non-coding	mammal		6.77815	-7.60206
													ISA		Human	Vigilant et al. 1991	6000000	8.65e-08	fossil	HVRI and HVRII	non-coding	mammal		6.77815	-7.06298
													ISA		Human	this study (Fu et al. 2013 + chimpanzee sequence)	6000000	8.4673e-08	fossil + aDNA	d-loop	non-coding	mammal		6.77815	-7.07226
Human	this study	Ingman et al. 2000 sequences + Sivapithecus fossil calibration (Kelley 2002)	12500000	5.1126e-08	fossil	d-loop	non-coding	mammal		7.09691	-7.29136	7	ISA
Human	average from: Bendall et al. 1996, Cavelier et al. 2000, Heyer et al. 2001, Howell et al. 1996, Howell et al. 2003, Madrigal et al. 2012, Mumm et al. 1997, Parsons and Holland 1998, Parsons et al. 1997, Santos et al. 2005, Sigurðardóttir et al. 2000, Soodyall et al. 1997		187.5	1.03114e-06	pedigree	d-loop	non-coding	mammal			-5.98668
													ISA		Human	Bendall et al. 1996	25	1.41995e-06	pedigree	d-loop	non-coding	mammal		1.39794	-5.84773
													ISA		Human	Heyer et al. 2001	300	4.67995e-07	pedigree	d-loop	non-coding	mammal		2.47712	-6.32976
													ISA		Human	Howell et al. 1996	250	7.22596e-07	pedigree	d-loop	non-coding	mammal		2.39794	-6.1411
													ISA		Human	Howell et al. 2003	275	1.92706e-07	pedigree	d-loop	non-coding	mammal		2.43933	-6.7151
													ISA		Human	Madrigal et al. 2012	410	2.69127e-06	pedigree	d-loop	non-coding	mammal		2.61278	-5.57004
													ISA		Human	Mumm et al. 1997	100	1.11473e-06	pedigree	d-loop	non-coding	mammal		2	-5.95283
													ISA		Human	Parsons et al. 1997	50	2.00531e-06	pedigree	d-loop	non-coding	mammal		1.69897	-5.69782
													ISA		Human	Parsons and Holland 1998 -only data that was not published in Parsons 1997	50	1.06336e-06	pedigree	d-loop	non-coding	mammal		1.69897	-5.97332
													ISA		Human	Santos et al. 2005	125	7.90342e-07	pedigree	d-loop	non-coding	mammal		2.09691	-6.10218
													ISA		Human	Sigurğardóttir et al. 2000	440	2.52916e-07	pedigree	d-loop	non-coding	mammal		2.64345	-6.59702
													ISA		Human	Cavelier et al. 2000	75	4.55e-07	pedigree	d-loop	non-coding	mammal		1.87506	-6.34199
													ISA		Human	Soodyall et al. 1997	150	1.1975e-06	pedigree	d-loop	non-coding	mammal		2.17609	-5.92172
Humpback whale	Roman and Palumbi 2003		10000000	1.45e-08	fossil	d-loop	non-coding	mammal		7	-7.83863	7
Lemming	this study	Prost et al. 2010	21910	1.6205e-07	aDNA	cyt b	coding	mammal		4.34064	-6.79035	4
Lemming	this study	Prost et al. 2010	21910	5.2436e-08	aDNA	d-loop	non-coding	mammal		4.34064	-7.28037	4
Mus musculus	Goios et al. 2007		12000000	3.71e-08	fossil	mitogenome (excl. Dloop)	coding	mammal		7.07918	-7.43063	7
Muskox	Molak et al. 2013	Campos et al. 2010b	42550	9.0236e-07	aDNA	d-loop	non-coding	mammal		4.6289	-6.04462	4
Muskox (Ovibos moschatus, Bison bison)	this study	Vrba & Schaller 2000, paleodb.org	20000000	5.1925e-08	fossil	d-loop	non-coding	mammal		7.30103	-7.28462	7
Mysticetes (Mammali: Cetacea)	Dornburg et al. 2012		40000000	5.63e-09	fossil	13 mt genes	coding	mammal		7.60206	-8.24949	7
Northern fur seal (Callorhinus ursinus) and sea lions	Pinsky et al. 2010		12320000	6.7e-08	fossil	cyt b	coding	mammal		7.09061	-7.17393	7
Odontocetes (Mammali: Cetacea)	Dornburg et al. 2012		38000000	1.38e-08	fossil	13 mt genes	coding	mammal		7.57978	-7.86012	7
Pan paniscus and P. Troglodytes	Pesole et al. 1999		2500000	7.28e-09	fossil, molecular	mitogenome	coding	mammal		6.39794	-8.13787	6
															Pan paniscus and P. Troglodytes	Pesole et al. 1999	2500000	4.2e-09	fossil, molecular	tRNAs	coding	mammal		6.39794	-8.37675
															Pan paniscus and P. Troglodytes	Pesole et al. 1999	2500000	2.4e-09	fossil, molecular	12S rRNA	coding	mammal		6.39794	-8.61979
															Pan paniscus and P. Troglodytes	Pesole et al. 1999	2500000	5e-09	fossil, molecular	16SrRNA	coding	mammal		6.39794	-8.30103
															Pan paniscus and P. Troglodytes	Pesole et al. 1999	2500000	2.6e-09	fossil, molecular	protein coding genes nonsyn	coding	mammal		6.39794	-8.58503
															Pan paniscus and P. Troglodytes	Pesole et al. 1999	2500000	2.22e-08	fossil, molecular	protein coding genes syn	neutral coding	mammal		6.39794	-7.65365
Pan paniscus and P. Troglodytes	Pesole et al. 1999		2500000	2.18e-08	fossil, molecular	d-loop	non-coding	mammal		6.39794	-7.66154	6
Peturus marsupial	Malekian et al. 2010		4460000	1.8e-08	fossil	ND2, ND4	coding	mammal		6.64933	-7.74473	6
Pika (Lagomorpha)	Lanier and Olson 2009		31000000	1.85e-08	secondary calibration for leporid-ochotonid splitbased on many fossil calibrations and relaxed clock	cyt b, ND4	coding	mammal		7.49136	-7.73283	7
Pika (Lagomorpha)	Lanier and Olson 2009		37000000	1.55e-08	fossil	cyt b, ND4	coding	mammal		7.5682	-7.80967	7
Pika (Lagomorpha)	Lanier and Olson 2009		65000000	6e-09	secondary calibration based on the Bininda-Emonds supertree for leporid-ochotonid split	cyt b, ND4	coding	mammal		7.81291	-8.22185	7
red fox	this study	Teacher et al. 2011	30000	1.6367e-07	aDNA	cyt b	coding	mammal		4.47712	-6.78603	4
red fox	this study	Flynn & Galliano 1982, Wayne et al. 1997	52000000	6.8472e-09	fossil	cyt b	coding	mammal		7.716	-8.16449	7
red fox	this study	Teacher et al. 2011	30000	6.1767e-07	aDNA	d-loop	non-coding	mammal		4.47712	-6.20924	4
red fox	this study	Flynn & Galliano 1982, Wayne et al. 1997	52000000	9.2909e-10	fossil	d-loop	non-coding	mammal		7.716	-9.03194	7
Reindeer	Molak et al. 2013	Lorenzen et al 2011	37500	4.2171e-07	aDNA	d-loop	non-coding	mammal		4.57403	-6.37499	4
Saiga antelope	Campos et al. 2010		40400	5.204e-07	aDNA	d-loop	non-coding	mammal		4.60638	-6.28366	4
southern elephant seal (Mirounga leonina)	Slade et al. 1998		23000000	7.5e-08	fossil	HVRI	non-coding	mammal		7.36173	-7.12494	7
Sunda clouded leopard	Wilting et al. 2011		6370000	2.9972e-07	fossil	ATPase8 and cyt b	coding	mammal		6.80414	-6.52328	6
Talpa (mole genus)	Colangelo et al. 2010		38300000	1.407e-08	fossil	cyt b	coding	mammal		7.5832	-7.85171	7
Taurine cattle	Bollongino et al. 2012		8451	4.5e-07	aDNA	HVR	non-coding	mammal		3.92691	-6.34679	3
Tuco-tuco	Molak et al. 2013	Chan et al 2006	10209	5.7489e-07	aDNA	cyt b	coding	mammal		4.00898	-6.24042	4
Woolly mammoth	this study	Debruyne et al. 2008	55082	6.3037e-08	aDNA	cyt b, trnT, trnP	coding	mammal		4.74101	-7.2004	4
Woolly mammoth (Mammuthus primigenius, Elephas maximus)	this study	Rohland et al. 2010	8500000	6.4154e-10	fossil	cyt b, trnT, trnP	coding	mammal		6.92942	-9.19278	6
Woolly mammoth (Mammuthus primigenius, Loxodonta africana)	this study	Rohland et al. 2010	9000000	4.3444e-10	fossil	cyt b, trnT, trnP	coding	mammal		6.95424	-9.36207	6
Woolly mammoth (Mammuthus primigenius, Mammut americanum)	this study	Rohland et al. 2010	30000000	1.7766e-10	fossil	cyt b, trnT, trnP	coding	mammal		7.47712	-9.75041	7
Woolly mammoth	this study	Debruyne et al. 2008	55082	1.9934e-07	aDNA	d-loop	non-coding	mammal		4.74101	-6.70041	4
Woolly mammoth (Mammuthus primigenius, Elephas maximus)	this study	Rohland et al. 2010	8500000	2.4015e-08	fossil	d-loop	non-coding	mammal		6.92942	-7.61952	6
Woolly mammoth (Mammuthus primigenius, Loxodonta africana)	this study	Rohland et al. 2010	9000000	2.0737e-08	fossil	d-loop	non-coding	mammal		6.95424	-7.68325	6
Woolly mammoth (Mammuthus primigenius, Mammut americanum)	this study	Rohland et al. 2010	30000000	5.1526e-10	fossil	d-loop	non-coding	mammal		7.47712	-9.28797	7
Woolly rhinoceros	Molak et al. 2013	Lorenzen et al 2011	31390	3.3217e-07	aDNA	d-loop	non-coding	mammal		4.49679	-6.47864	4
Woolly rhinoceros (Coelodonta antiquitatis, Dicerorhinus sumatrensis)	this study	Willerslev et al. 2009; Carroll 1988	56000000	1.381e-07	fossil	d-loop	non-coding	mammal		7.74819	-6.85981	7
SUMMARY:
number of data points (averaged):	239
bird	110
mammal	76
reptile	20
insect	33
non-coding	57
coding	182
human rate estimates used in intraspecific analysis	26
novel estimates and re-estimates calculated in this study	31
