# Supplementary material for: Prolonged decay of molecular rate estimates for metazoan mitochondrial DNA
Source: PeerJ. 2015 Mar 5;3:e821. doi: 10.7717/peerj.821 (PMC4358697; doi:10.7717/peerj.821)
Supplement: Table S4 — Linear-regression analysis of log-transformed rate estimates against the log-transformed calibration times that were used to estimate the rates. Analyses were done for time-slice subsets of data using a sliding window with a width of four orders of magnitude or using a shrinking window for the oldest calibration times. [file peerj-03-821-s006.docx]

|  | **Time-slice subset** | **100-104 years** | **101-105 years** | **102-106 years** | **103-107 years** | **104-108 years** | **105-109 years** | **106-109 years** | **107-109 years** | **108-109 years** |
| --- | --- | --- | --- | --- | --- | --- | --- | --- | --- | --- |
| **Coding markers** | **N** | 1 | 9 | 20 | 132 | 176 | 173 | 162 | 50 | 5 |
| **R2** | 0 | 0.05 | 0.24 | 0.31 | 0.23 | 0.09 | 0.04 | 0.11 | 0.04 |
| **P-value** | n/a | 5.67×10-1 | 2.67×10-2  * | 3.43×10-12  *** | 1.48×10-11  *** | 4.79×10-5  *** | 1.26×10-2  * | 1.76×10-2  * | 7.6×10-1 |
| **Slope** | n/a | -0.33 | -0.34 | -0.37 | -0.29 | -0.20 | -0.15 | -0.34 | 0.36 |
| **Slope std err** | n/a | 0.55 | 0.14 | 0.05 | 0.04 | 0.05 | 0.06 | 0.14 | 1.07 |
| **Non-SSC**  **Randomizationa** | - | 0.137 | <0.0001  *** | <0.0001  *** | <0.0001  *** | <0.0001  *** | <0.0001  *** | <0.0001  *** | 0.1387 |
| **Non-SSC**  **H0: s=-1b** | n/a | 2.60×10-1 | 1.82×10-4 *** | 7.12×10-26  *** | 9.12×10-40  *** | 1.11×10-36  *** | 6.96×10-31  *** | 1.52×10-5  *** | 2.94×10-1 |
| **Non-coding markers** | **N** | 8 | 25 | 27 | 43 | 48 | 31 | 29 | 12 | 1 |
| **R2** | 0.12 | 0.27 | 0.33 | 0.62 | 0.55 | 0.27 | 0.17 | 0.16 | 0 |
| **P-value** | 4.09×10-1 | 7.41×10-3  * | 1.80×10-3  ** | 4.47×10-10  *** | 1.41×10-9  *** | 2.58×10-3  ** | 2.55×10-2  * | 2.00×10-1 | n/a |
| **Slope** | 0.08 | -0.34 | -0.36 | -0.48 | -0.49 | -0.58 | -0.53 | -0.89 | n/a |
| **Slope std err** | 0.10 | 0.12 | 0.10 | 0.06 | 0.06 | 0.17 | 0.22 | 0.65 | n/a |
| **Non-SSC**  **Randomizationa** | 0.0023  ** | 0.0001  *** | <0.0001  *** | <0.0001  *** | <0.0001  *** | 0.0098  ** | 0.02  * | 0.4305 | - |
| **Non-SSC**  **H0: s=-1b** | 2.79×10-5  *** | 9.61×10-6  *** | 1.31×10-6  *** | 8.46×10-11  *** | 4.31×10-10  *** | 2.20×10-2  * | 4.39×10-2  * | 8.64×10-1 | n/a |

aNon-SSC – results of tests against spurious self-correlation using randomized genetic distances to create 10,000 new regressions and inspecting whether the original estimate of the slope falls within the distribution of slopes estimated from the randomized data

bNon-SSC – results of tests against spurious self-correlation using slope s=-1 (average slope for all regressions with randomized genetic distance) as null hypothesis for regression;

* p<0.05, ** p<0.005, *** p<0.0005.
